## POSITIVE COUPLING OF $\beta$ -LIKE ADRENERGIC RECEPTORS WITH ADENYLATE CYCLASE IN THE CNIDARIAN *RENILLA* *KOELLIKERI*

EDWARD W. AWAD AND MICHEL ANCTIL

*Département de sciences biologiques, Université de Montréal, CP6128, Succursale 'A',  
Montréal, Québec, Canada H3C 3J7*

*Accepted 5 May 1993*

### Summary

Coupling of the previously characterized  $\beta_1$ - and  $\beta_2$ -like adrenoceptors in the sea pansy *Renilla koellikeri* with adenylylase was examined in membrane preparations from this cnidarian. Adenylylase activity was stimulated by several guanine nucleotides, such as GTP, Gpp(NH)p and GTP $\gamma$ S. Fluoride ions and cholera toxin greatly enhanced the enzyme activity, whereas forskolin had no effect on basal or isoproterenol-induced stimulation of the enzyme. The stimulation of adenylylase activity by several  $\beta$ -adrenergic agonists in different parts of the animal reflected a positive coupling with the  $\beta_2$ - and  $\beta_1$ -like adrenoceptors in autozooid and peduncle tissues, respectively. In addition, isoproterenol-induced stimulation of adenylylase activity was dependent on guanine nucleotides, suggesting coupling mediated by a G protein. The pharmacological profile of various antagonists on isoproterenol-sensitive adenylylase in autozooid and peduncle tissues matched that of previous radioligand binding studies. Isoproterenol-induced stimulation of adenylylase activity in rachidial tissues was partially inhibited by trifluoperazine or ( $\pm$ )CGP12177 and was completely blocked in the presence of both antagonists. This suggests that coupling of the enzyme occurs with  $\beta_1$ - and  $\beta_2$ -like adrenoceptors, both being present in the rachis. Serotonin and dopamine were also found to stimulate adenylylase activity. Their stimulatory effect was additive to isoproterenol-induced activation, suggesting the presence of dopaminergic and serotonergic receptors in the tissues of the sea pansy. Along with the data presented previously on  $\beta$ -adrenergic binding, this study suggests that elements of receptor-dependent G protein signal transduction originated early in invertebrate evolution.

### Introduction

Over the last 20 years or so, coelenterate neurobiology has attracted considerable attention from zoologists. This interest originated from the widely held view that early nervous systems emerged first in this group of animals. The application of intracellular recording techniques has greatly enhanced our understanding of the physiology of both

Key words: adenylylase,  $\beta$ -like adrenoceptors, G protein, positive coupling, Cnidaria, sea pansy, *Renilla koellikeri*.

electrical and chemical synapses in these early metazoans (see review by Anderson and Spencer, 1989; Anderson and Schwab, 1982). Studying coelenterate neuropharmacology provided an opportunity to unravel the evolutionary origin of chemical neurotransmission. A great deal was learnt about the behavior of different species and the type of electrical signals associated with each behavior. However, information on the identity of neuroactive substances and pharmacological mechanisms of neurotransmission in coelenterates remain scarce.

Some evidence for the involvement of catecholaminergic-like mechanisms in the control of colonial behavioral responses comes from the bioluminescent sea pansy *Renilla koellikeri* (Cnidaria, Anthozoa). The colony is composed of two types of individuals called polyps. Luminescence originates in photocytes (light-emitting cells) located in the endoderm of autozooid (feeding) and siphonozooid (water-pumping) polyps (Morin, 1974).

The luminescent behavior of *R. koellikeri* is a colonial response mediated by a through-conducting nerve net (Anderson and Case, 1975). On the basis of a pharmacological study, Anctil *et al.* (1982) suggested the presence of adrenergic mechanisms associated with the neural control of bioluminescence in this species. Epinephrine, but not norepinephrine, was found to induce luminescence in polyps, and this response was depressed by the classical  $\beta$ -adrenergic blocker propranolol. Subsequently, a  $\text{Ca}^{2+}$ -dependent and desipramine-sensitive uptake mechanism for both epinephrine and norepinephrine was reported in *R. koellikeri* (Anctil *et al.* 1984). Later, De Waele *et al.* (1987) detected the presence of both epinephrine and norepinephrine in the tissues of the sea pansy, using radioenzymatic and HPLC-ED techniques.

Recently, Awad and Anctil (1993) have demonstrated the presence of two different classes of  $\beta$ -adrenergic binding sites, site<sub>1</sub> and site<sub>2</sub>, in membrane preparations from *R. koellikeri*. Using two different  $\beta$ -adrenergic radioligands, dihydroalprenolol and ( $\pm$ )CGP12177, binding was found to be specific, rapid, reversible and saturable and to have a high affinity as well as a marked specificity for  $\beta$ -adrenergic agonists and antagonists. The major characteristics of these  $\beta$ -adrenergic receptor sites are as follows.

First, the distribution of the binding sites in various parts of the colony reflected their functions. Site<sub>1</sub> was detected in polyp tissues. The specificity pattern of the physiological effect of  $\beta$ -adrenergic drugs on luminescence mirrored that of the radioligand interaction with site<sub>1</sub>, suggesting an association with bioluminescent activity. In contrast, radioligand binding corresponding to site<sub>2</sub> was observed in colonial tissues, namely the rachis (the muscular body of the colony) and the peduncle (the anchoring muscular organ; for the general organization of the colony see Awad and Anctil, 1993). Site<sub>2</sub> distribution substantiates previous pharmacological investigations (Anctil *et al.* 1982) and suggests that this site plays a role in muscle activity.

Second, the two sites displayed different radioligand specificity. [<sup>3</sup>H]DHA was found to bind to both sites, whereas [<sup>3</sup>H]CGP12177 recognized site<sub>1</sub> only.

Third, displacement studies with different drugs revealed different pharmacological properties for the sites. The pharmacological profile of  $\beta$ -adrenergic binding in *R. koellikeri* membrane fractions followed a pattern similar to  $\beta_2$ - and  $\beta_1$ -adrenoceptor subtypes for site<sub>1</sub> and site<sub>2</sub>, respectively.

Fourth, the pharmacological properties of the  $\beta$ -adrenergic receptor sites in the sea pansy differ from those of mammals. Atenolol, a  $\beta_1$ -selective blocker, was found to act as an agonist on the  $\beta_2$ -like site<sub>1</sub> and to induce luminescence like the other  $\beta$ -adrenergic agonists. Similarly, the antidepressant and dopaminergic antagonist trifluoperazine acted as an antagonist on site<sub>2</sub>.

In mammalian systems, interaction of a  $\beta$ -adrenergic agonist with its binding site on the cell surface stimulates a guanine-nucleotide regulatory protein (G protein) that binds GTP and acts to convey information from the receptor to the catalytic unit of the membrane-bound adenylate cyclase. When activated, this enzyme catalyses the formation of the second messenger cyclic AMP from ATP (Stadel, 1991). Therefore, this study was undertaken to examine whether, in this cnidarian, such coupling exists with adenylate cyclase and to examine the degree of pharmacological similarity between the cnidarian signal transduction system and its mammalian counterpart.

## Materials and methods

### *Tissue preparation*

Colonies of *Renilla koellikeri* Pfeffer were purchased from Marinus Inc. (California, USA). They were kept in aerated, filtered and circulating sea water (12–16°C; pH7.4–8.0; specific gravity 1.025). The colonies were exposed to 12h:12h light:dark daily cycles and were used within a few days of arrival. Autozooid polyps were excised after anesthetizing the colony in 0.37mol l<sup>-1</sup> MgCl<sub>2</sub> mixed with artificial sea water (1:1). The peduncle and the rachis (including siphonozooid polyps) were then separated from each other and cut into small pieces. The tissues were homogenized at 0°C with a Brinkman polytron homogenizer in Tris-HCl (50mmol l<sup>-1</sup>, pH7.4) containing 0.25mol l<sup>-1</sup> sucrose, 2mmol l<sup>-1</sup> EDTA and 1mmol l<sup>-1</sup> dithiothreitol. The homogenates were centrifuged for 10min at 1000g. The supernatant was collected and centrifuged at 35000g for 20min at 0°C. The pellet was resuspended in Tris-HCl buffer, centrifuged for 20min at 35000g and washed three times by repeated centrifugation. The final pellet was resuspended in Tris-HCl containing 2mmol l<sup>-1</sup> MgCl<sub>2</sub> and 1mmol l<sup>-1</sup> EDTA.

### *Adenylate cyclase assay*

The resuspended pellets were thawed immediately before use. The protein content of the crude membrane preparations was determined according to the method of Bradford (1976), using a Bio-Rad protein assay kit.

Adenylate cyclase activity was determined in an assay medium slightly modified from that of Salomon (1979). The reaction was conducted in Tris-HCl buffer (50mmol l<sup>-1</sup>; pH 7.4) containing 4mmol l<sup>-1</sup> MgCl<sub>2</sub>, 1mmol l<sup>-1</sup> cyclic AMP, 0.5mmol l<sup>-1</sup> ATP, 1mmol l<sup>-1</sup> EDTA, 1mmol l<sup>-1</sup> dithiothreitol, 1mmol l<sup>-1</sup> theophylline, 10  $\mu$ mol l<sup>-1</sup> GTP and 1.2  $\mu$ Ci of [<sup>3</sup>H]ATP. The reaction was initiated by the addition of the membrane suspension (100–200  $\mu$ g of protein) in a final volume of 100  $\mu$ l and was carried out routinely for 30min at 25°C. The reaction was terminated by adding 200  $\mu$ l of a stopping solution containing 2% SDS (sodium dodecyl sulfate) and 10mmol l<sup>-1</sup> cyclic AMP. To determine cyclic AMP recovery, 25  $\mu$ l of a standard <sup>14</sup>C-labelled cyclic AMP solution

was added to each tube. The tubes were boiled for 3min. Separation of  $^3\text{H}$ -labelled cyclic AMP from its precursor [ $^3\text{H}$ ]ATP and from the other metabolites of ATP was achieved by sequential chromatography with Dowex 50W-X4 ( $^+\text{H}$  form, 200–400 mesh; Bio-Rad) and then alumina (70–230 mesh; Sigma) columns.

[ $^3\text{H}$ ]cyclic AMP and [ $^{14}\text{C}$ ]cyclic AMP were eluted from alumina columns with 3ml of  $0.1\text{mol l}^{-1}$  imidazole-HCl (pH7.5) into scintillation vials containing 10ml of Universol scintillation fluid (ICN Radiochemicals) and counted in a two-channel scintillation counter. The recovered [ $^3\text{H}$ ]cyclic AMP was corrected by using [ $^{14}\text{C}$ ]cyclic AMP as an internal standard. The recovery of [ $^3\text{H}$ ]cyclic AMP from the Dowex alumina column system was consistently between 60 and 75%.

#### *Data analysis*

$\text{EC}_{50}$  and  $\text{IC}_{50}$  values (concentration of agonist inducing half-maximal stimulation of adenylate cyclase or of antagonist inducing half-maximal inhibition of agonist-induced stimulation of adenylate cyclase, respectively) were determined by fitting a four-variable logistic equation to the data using the SigmaPlot computation procedure (Jandel Corporation, USA).

Statistical analyses of paired data were performed using Student's *t*-test. One-way analysis of variance (ANOVA) was used to compare multiple groups of means. Statistical significance was taken as  $P < 0.05$ . Results are presented as means  $\pm$  standard deviation. The number of animals used in each experimental condition (*N*) ranged between three and eight.

#### *Chemicals*

Most chemicals used were purchased from Sigma Chemical Co., St Louis, MO, including Antho-RFamide, atenolol, cholera toxin, dopamine, (–)epinephrine, forskolin, Gpp(NH)p, GTP $\gamma$ s, GDP $\beta$ s, haloperidol, NaF, (–)norepinephrine, octopamine, pindolol, phentolamine, (–)propranolol, (+)propranolol, serotonin and yohimbine. [ $^3\text{H}$ ]ATP ( $1.1\text{TBqmmol}^{-1}$ ) and [ $^{14}\text{C}$ ]cyclic AMP ( $1.9\text{GBqmmol}^{-1}$ ) were obtained from New England Nuclear/Du Pont Canada Inc; (–)isoproterenol, (+)isoproterenol and ( $\pm$ )CGP12177 from Research Biochemicals Inc., MA, USA. Methysergide was a gift from Sandoz Canada Inc.

### **Results**

Since site<sub>1</sub> ( $\beta_2$ -like) is localized in polyp tissues and site<sub>2</sub> ( $\beta_1$ -like) in rachidial and peduncle tissues (Awad and Anctil, 1993), the possible coupling of  $\beta$ -adrenoceptors with adenylate cyclase in *R. koellikeri* was investigated in autozooid tissues for site<sub>1</sub> and in peduncle tissues for site<sub>2</sub>, unless otherwise stated.

#### *Basal activity of adenylate cyclase in R. koellikeri*

The basal activity of adenylate cyclase in membrane fractions of the sea pansy was measured in the presence of  $10\ \mu\text{mol l}^{-1}$  GTP and  $1\text{mmol l}^{-1}$  theophylline. In the absence of GTP and  $\text{Mg}^{2+}$ , basal activity was negligible. The activity in autozooid and

peduncle crude membrane preparations was found to increase linearly with protein content (35–425  $\mu\text{g}$ ) in the assay. In the experiments described below, protein content of the membrane suspensions was in the range 100–200  $\mu\text{g}$ .

Accumulation of cyclic AMP increased linearly with time up to about 30min of incubation. An incubation time of 30min was routinely used. Adenylyl cyclase activity was found to be temperature-dependent. It was negligible at 0°C and optimal at 25°C. The activities at 16°C and 45°C were about 80% and 20% of the optimal value, respectively. All experiments were routinely conducted at 25°C. Cyclic AMP accumulation was found to be dependent on the pH of the assay medium. The activity did not change between pH 7.0 and 8.0 but decreased markedly below pH 7.0 and above pH 8.0.

Under the standard assay conditions detailed above, the basal activities in crude membrane preparations extracted from three different parts of the colony were as follows: autozooids,  $0.147 \pm 0.008 \text{ pmol min}^{-1} \text{ mg}^{-1} \text{ protein}$ ; rachis,  $0.069 \pm 0.016 \text{ pmol min}^{-1} \text{ mg}^{-1} \text{ protein}$ ; peduncle,  $0.310 \pm 0.057 \text{ pmol min}^{-1} \text{ mg}^{-1} \text{ protein}$  ( $N=8$ ).

*Effects of guanine nucleotides, cholera toxin and fluoride ions on adenylyl cyclase activity*

To investigate the possible involvement of a G protein in mediating the activation of adenylyl cyclase by the receptors, the effect of guanine nucleotides, cholera toxin and NaF on the activation of the enzyme were tested.

GTP and its stable analogue Gpp(NH)p were found to stimulate autozooid adenylyl cyclase activity in a dose-dependent fashion (Fig. 1). Half-maximal stimulation of basal activity occurred at  $14.38 \pm 0.87 \mu\text{mol l}^{-1}$  for GTP and at  $1.31 \pm 0.08 \mu\text{mol l}^{-1}$  for Gpp(NH)p. At saturation concentration, stimulation was about threefold above basal for GTP and fivefold above basal for Gpp(NH)p.

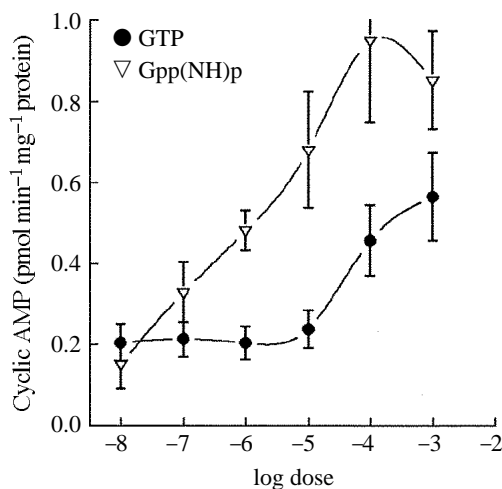

Fig. 1. Effect of increasing concentrations of GTP and Gpp(NH)p (in  $\text{mol l}^{-1}$ ) on adenylyl cyclase activity in crude membrane preparations from autozooid tissues. Mean  $\pm$  S.D.,  $N=4$ .

Table 1. *The effects of guanine nucleotides, NaF, forskolin and cholera toxin on adenylate cyclase activity in autozooid and peduncle crude membrane preparations*

|                                           | Autozooids                                                               |              | Peduncle                                                                 |              |
|-------------------------------------------|--------------------------------------------------------------------------|--------------|--------------------------------------------------------------------------|--------------|
|                                           | Specific activity<br>(pmolmin <sup>-1</sup> mg <sup>-1</sup><br>protein) | Stimulation† | Specific activity<br>(pmolmin <sup>-1</sup> mg <sup>-1</sup><br>protein) | Stimulation† |
| Basal*                                    | 0.15±0.08                                                                | 1.0          | 0.31±0.06                                                                | 1.0          |
| Gpp(NH)p (10 µmol l <sup>-1</sup> )       | 0.68±0.14                                                                | 4.6          | 1.55±0.16                                                                | 5.0          |
| GTPγs (100 µmol l <sup>-1</sup> )         | 0.87±0.12                                                                | 5.9          | 1.49±0.14                                                                | 4.8          |
| GDPβs (10 µmol l <sup>-1</sup> )          | 0.14±0.02                                                                | 0.9          | 0.27±0.03                                                                | 0.8          |
| NaF (100mmol l <sup>-1</sup> )            | 1.10±0.13                                                                | 7.5          | 1.64±0.13                                                                | 5.3          |
| Forskolin (100 µmol l <sup>-1</sup> )     | 0.16±0.04                                                                | 1.0          | 0.35±0.03                                                                | 1.1          |
| Cholera toxin<br>(1.5mgml <sup>-1</sup> ) | 1.74±0.14                                                                | 11.6         | 1.72±0.01                                                                | 5.5          |

\*In the presence of 10 µmol l<sup>-1</sup> GTP.  
†Stimulation is the level of activity compared with the basal level.  
Values are mean ± S.D., N=8.

Sodium fluoride (100mmol l<sup>-1</sup>) and the GTP analogue GTPγs (100 µmol l<sup>-1</sup>) caused a five- to sevenfold increase in adenylate cyclase activity in crude membrane fractions extracted from autozooid and peduncle tissues. In contrast, GDPβs was found to depress adenylate cyclase activity slightly at 10 µmol l<sup>-1</sup>. The effects of these GTP analogues on the enzyme are summarised in Table 1.

To assess the possible involvement of a stimulatory G protein in the coupling between the receptor and the adenylate cyclase, the effect of cholera toxin was tested on the enzyme activity in both autozooid and peduncle membrane fractions (Table 1). Autozooid adenylate cyclase activity was increased 10- to 11-fold over basal levels by cholera toxin (1.5mgml<sup>-1</sup>). In contrast, a five- to sixfold increase was observed in the peduncle.

Finally, forskolin had no significant effect on cyclic AMP accumulation in either tissue at 100 µmol l<sup>-1</sup> (Table 1).

*Stimulation of adenylate cyclase by β-adrenergic agonists and the β<sub>1</sub>-selective blocker atenolol*

The ability of several β-adrenergic agonists to stimulate adenylate cyclase activity in the sea pansy was tested. In autozooid tissues, (-)isoproterenol, epinephrine and atenolol were found to stimulate adenylate cyclase activity with a rank order of efficacy of (-)isoproterenol = atenolol > (-)epinephrine (Fig. 2A; Table 2). At a saturation concentration of 100 µmol l<sup>-1</sup>, stimulation was about sixfold. The effects of (-)isoproterenol and atenolol on adenylate cyclase activity were not additive. (-)Norepinephrine and the less active isomer (+)isoproterenol induced a small but significant increase (1.5-fold) in adenylate cyclase activity.

All three agonists, (-)isoproterenol, epinephrine and norepinephrine, induced a

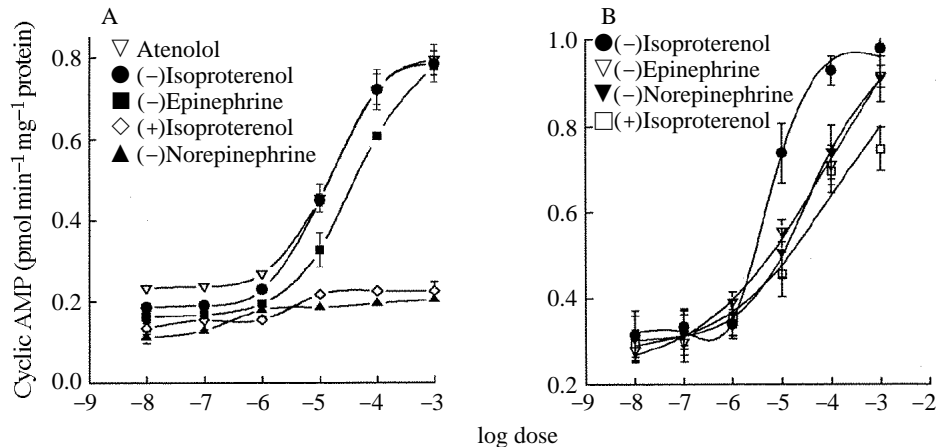

Fig. 2. Effects of  $\beta$ -adrenergic agonists and the  $\beta_1$ -adrenergic antagonist atenolol on adenylate cyclase activity in crude membrane preparations extracted from autozooid (A) and peduncle (B) tissues. Mean  $\pm$  S.D.,  $N=8$ .

threefold increase of adenylate cyclase activity in the peduncle with an order of efficacy of (-)isoproterenol > (-)epinephrine = (-)norepinephrine (Fig. 2B; Table 2). (+)Isoproterenol was about four times less active than the (-) isomer. Atenolol, however, had no significant effect on the enzyme activity in the peduncle.

*Effects of guanine nucleotides, theophylline and forskolin on isoproterenol-induced stimulation of adenylate cyclase*

The following experiments were undertaken to investigate the dependency of agonist-induced increases in adenylate cyclase activity on guanine nucleotides and to test for the possible presence of an endogenous phosphodiesterase in the assay medium.

In the absence of GTP, the activity stimulated by isoproterenol and atenolol in autozooids and by isoproterenol in the peduncle was about twofold greater than basal levels. Addition of  $10 \mu\text{mol l}^{-1}$  GTP enhanced the stimulatory effect of these agonists (Fig. 3). Agonist-induced stimulation of the enzyme in both tissues was completely blocked by the addition of  $10 \mu\text{mol l}^{-1}$  GDP $\beta$ s to the incubation medium. Finally, the

Table 2. Efficacy values ( $EC_{50}$ ,  $\mu\text{mol l}^{-1}$ ) of different  $\beta$ -adrenergic agonists on stimulation of adenylate cyclase activity in autozooid and peduncle tissues

| Agonist           | Autozooids       | Peduncle         |
|-------------------|------------------|------------------|
| (-)Isoproterenol  | $8.40 \pm 0.79$  | $5.74 \pm 0.56$  |
| (+)Isoproterenol  | >1000            | $19.65 \pm 2.03$ |
| (-)Epinephrine    | $22.02 \pm 2.28$ | $23.92 \pm 2.34$ |
| (-)Norepinephrine | >1000            | $25.63 \pm 2.47$ |
| Atenolol          | $11.08 \pm 1.04$ | >1000            |

Values are mean  $\pm$  S.D.,  $N=8$ .

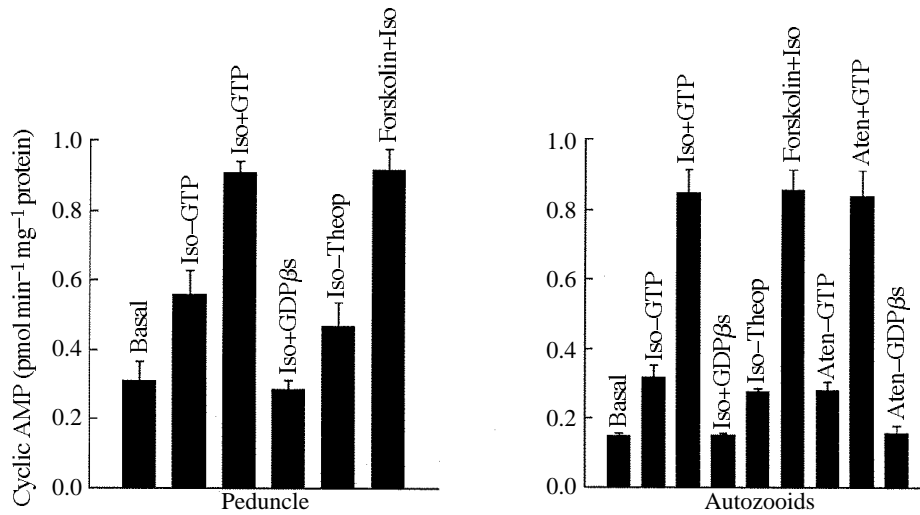

Fig. 3. Effect of GTP, GDPβs, theophylline and forskolin on isoproterenol- and atenolol-induced stimulation of adenylate cyclase activity in autozooid and peduncle tissues. Basal adenylate cyclase activity was measured in the presence of  $10\mu\text{mol l}^{-1}$  GTP. The minus sign indicates the omission of a substance from the assay medium. The plus sign indicates the addition of the substance to the assay medium.  $10\mu\text{mol l}^{-1}$  GTP and GDPβs and  $100\mu\text{mol l}^{-1}$  forskolin were added to the assay medium whenever indicated. Iso, isoproterenol ( $100\mu\text{mol l}^{-1}$ ); Aten, atenolol ( $100\mu\text{mol l}^{-1}$ ); Theop, theophylline ( $1\text{mmol l}^{-1}$ ). Mean  $\pm$  s.d.,  $N=4$ .

absence of theophylline substantially reduced the stimulatory effect of the agonists on adenylate cyclase activity in autozooid and peduncle membrane preparations.

In contrast, forskolin had no significant effect on the isoproterenol-induced increase of the enzyme activity in either tissue of the sea pansy (Fig. 3).

Table 3. Potency values ( $pK_{ac}$ ) of different blockers on isoproterenol-induced stimulation of adenylate cyclase activity in autozooid and peduncle tissues

| Compound          | Autozooids     | Peduncle       |
|-------------------|----------------|----------------|
| (-)Propranolol    | $8.45\pm 0.51$ | $8.10\pm 0.49$ |
| (+)Propranolol    | $6.64\pm 0.64$ | $7.59\pm 0.48$ |
| (-)Alprenolol     | $7.70\pm 0.59$ | $7.41\pm 0.44$ |
| Pindolol          | $8.20\pm 0.50$ | $8.57\pm 0.47$ |
| ( $\pm$ )CGP12177 | $7.21\pm 0.41$ | $<3.00$        |
| Trifluoperazine   | $<3.00$        | $7.44\pm 0.74$ |
| Atenolol          | -              | $<3.00$        |

Values are mean  $\pm$  s.d.,  $N=8$ .

$pK_{ac}$  is the inverse logarithm of  $K_{ac}$  values calculated, assuming competitive inhibition, from the equation  $IC_{50}=K_{ac}[1+(S/K_m)]$ , where  $K_m$  is the concentration of isoproterenol required for half-maximal stimulation of adenylate cyclase activity ( $8.404\mu\text{mol l}^{-1}$  in autozooids and  $5.736\mu\text{mol l}^{-1}$  in the peduncle) and  $S$  is the concentration of isoproterenol used ( $100\mu\text{mol l}^{-1}$ )



*Effects of antagonists on isoproterenol-induced stimulation of adenylate cyclase*

To compare the isoproterenol-sensitive adenylate cyclase in autozooid and peduncle tissues, the effects of various antagonists on the isoproterenol-induced increase in adenylate cyclase activity were investigated (Table 3).

A number of  $\beta$ -adrenergic antagonists were tested for their activities as inhibitors of the isoproterenol-sensitive adenylate cyclase in autozooid and peduncle tissues (Fig. 4). The rank order of potency of the different  $\beta$ -antagonists tested on isoproterenol-induced stimulation of adenylate cyclase activity in autozooid tissues was: pindolol = (-)propranolol > (-)alprenolol > ( $\pm$ )CGP12177 > (+)propranolol. (+)Propranolol was 1–2 orders of magnitude less potent than the (-) isomer. Trifluoperazine, however, was completely inactive at  $100 \mu\text{mol l}^{-1}$ .

In the peduncle, the (+) isomer of propranolol was slightly less effective than the (-) isomer. Of special interest is the inhibition of isoproterenol-stimulated adenylate cyclase activity by the antidepressant and dopaminergic antagonist trifluoperazine in peduncle tissues. The rank order of potency of the different antagonists tested on isoproterenol-induced stimulation of adenylate cyclase activity in peduncle tissues was: pindolol > (-)propranolol > (+)propranolol = (-)alprenolol = trifluoperazine. Atenolol and ( $\pm$ )CGP12177 were ineffective at  $100 \mu\text{mol l}^{-1}$ .

Finally, the  $\alpha$ -adrenergic antagonists phentolamine and yohimbine, and both methysergide and haloperidol, had little or no effect on isoproterenol-induced stimulation of adenylate cyclase in either autozooid or peduncle tissues.

*Resolution of two different  $\beta$ -adrenoceptor-adenylate cyclase couplings in rachidial membrane preparations*

Taking advantage of the selective action of ( $\pm$ )CGP12177 as an antagonist on site<sub>1</sub>

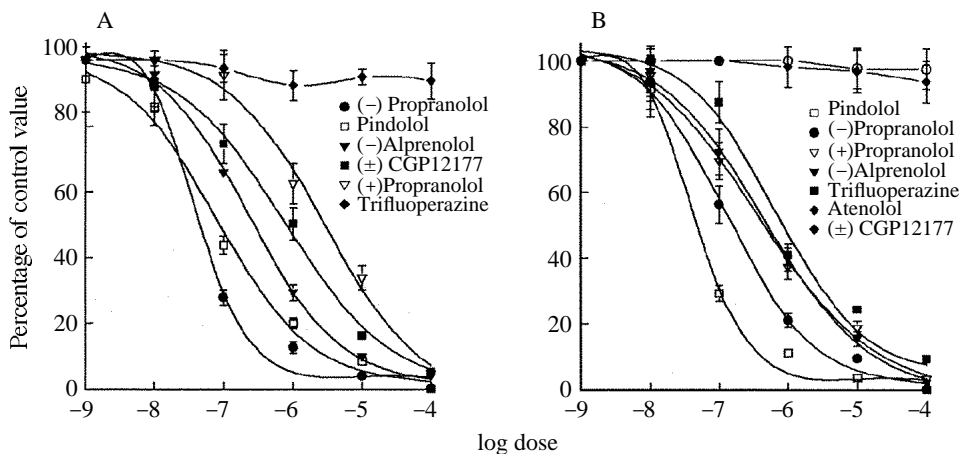

Fig. 4. Dose–response inhibition curves for isoproterenol-stimulated adenylate cyclase activity in autozooid (A) and peduncle (B) crude membrane preparations exposed to different  $\beta$ -adrenergic antagonists and trifluoperazine. The stimulation of adenylate cyclase by  $100 \mu\text{mol l}^{-1}$  isoproterenol in the absence of blockers was taken as 100%. Mean  $\pm$  s.d.,  $N=8$ .

( $\beta_2$ -like) and of trifluoperazine as an antagonist on site<sub>2</sub> ( $\beta_1$ -like) (Awad and Anctil, 1993), adenylate cyclase coupling with both sites in rachidial tissues was studied separately (Fig. 5).

(-)Isoproterenol stimulated adenylate cyclase activity by about fivefold at  $100 \mu\text{mol l}^{-1}$ . A threefold increase, however, was observed with atenolol at  $100 \mu\text{mol l}^{-1}$ . In the presence of  $10 \mu\text{mol l}^{-1}$  ( $\pm$ )CGP12177, (-)isoproterenol induced only a twofold increase in adenylate cyclase activity. In contrast, atenolol-induced stimulation was almost completely blocked by  $10 \mu\text{mol l}^{-1}$  ( $\pm$ )CGP12177.

Addition of  $10 \mu\text{mol l}^{-1}$  trifluoperazine reduced the increase in adenylate cyclase activity induced by isoproterenol to threefold, but had no effect on atenolol-induced stimulation of the enzyme. The presence of both trifluoperazine and ( $\pm$ )CGP12177 in the assay medium abolished the adenylate cyclase activity stimulated by  $100 \mu\text{mol l}^{-1}$  (-)isoproterenol in the rachis. Finally, the stimulatory effect of isoproterenol and atenolol on the enzyme was found not to be additive.

*Effects of other putative neuroactive substances on adenylate cyclase activity in the tissues of the sea pansy*

Several additional putative neuroactive substances were tested for their ability to stimulate adenylate cyclase in different parts of the colony (Table 4).

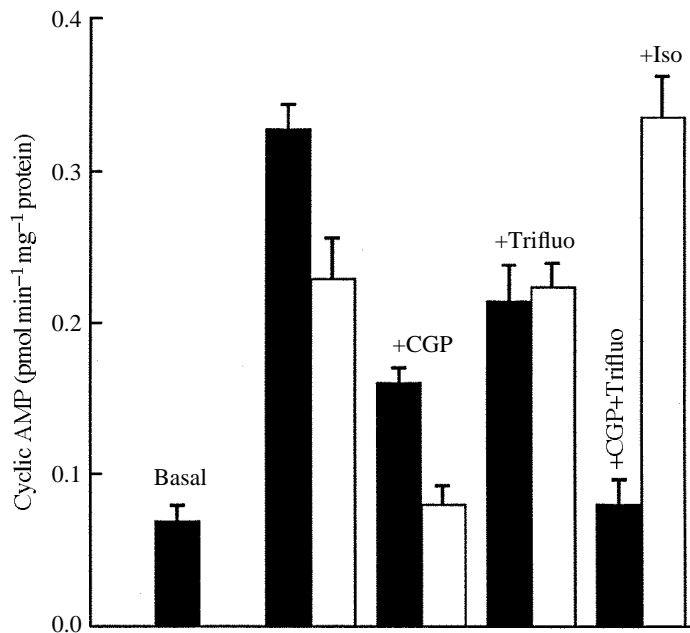

Fig. 5. Effects of ( $\pm$ )CGP12177 ( $10 \mu\text{mol l}^{-1}$ ) and trifluoperazine ( $10 \mu\text{mol l}^{-1}$ ) on isoproterenol-induced ( $100 \mu\text{mol l}^{-1}$ , filled bars) and atenolol-induced ( $100 \mu\text{mol l}^{-1}$ , open bars) stimulation of adenylate cyclase activity in crude membrane preparations extracted from rachidial tissues. The plus sign indicates the addition of the blocker to the assay medium. Enzyme activity was measured in the presence of  $10 \mu\text{mol l}^{-1}$  GTP. CGP, ( $\pm$ )CGP12177; Trifluo, trifluoperazine; Iso, (-)isoproterenol. Mean  $\pm$  S.D.,  $N=6$ .

Table 4. Effect of putative neuroactive substances ( $100 \mu\text{mol l}^{-1}$ ) on adenylate cyclase activity in the tissues of the sea pansy *Renilla koellikeri*

| Treatment                   | Specific activity ( $\text{pmol min}^{-1} \text{mg}^{-1} \text{protein}$ ) |                 |                 |
|-----------------------------|----------------------------------------------------------------------------|-----------------|-----------------|
|                             | Autozooids                                                                 | Rachis          | Peduncle        |
| Basal                       | $0.15 \pm 0.01$                                                            | $0.07 \pm 0.02$ | $0.31 \pm 0.06$ |
| Isoproterenol               | $0.85 \pm 0.07$                                                            | $0.33 \pm 0.04$ | $0.93 \pm 0.03$ |
| Dopamine                    | $0.39 \pm 0.07$                                                            | $0.55 \pm 0.01$ | $1.01 \pm 0.05$ |
| Dopamine+isoproterenol      | $1.26 \pm 0.14$                                                            | $0.91 \pm 0.01$ | $1.85 \pm 0.07$ |
| Serotonin                   | $1.17 \pm 0.07$                                                            | $0.69 \pm 0.01$ | $2.04 \pm 0.49$ |
| Serotonin+isoproterenol     | $2.08 \pm 0.17$                                                            | $0.95 \pm 0.04$ | $2.68 \pm 0.12$ |
| Octopamine                  | $0.18 \pm 0.03$                                                            | $0.08 \pm 0.01$ | $0.35 \pm 0.03$ |
| Octopamine+isoproterenol    | $0.86 \pm 0.11$                                                            | $0.39 \pm 0.08$ | $0.95 \pm 0.05$ |
| Antho-RFamide               | $0.32 \pm 0.09$                                                            | $0.08 \pm 0.01$ | $0.57 \pm 0.03$ |
| Antho-RFamide+isoproterenol | $0.85 \pm 0.06$                                                            | $0.35 \pm 0.05$ | $0.90 \pm 0.09$ |

Values are mean  $\pm$  S.D.,  $N=5$ .

Dopamine stimulated adenylate cyclase activity two- to threefold at  $100 \mu\text{mol l}^{-1}$  in autozooid and peduncle tissues, and six- to eightfold in the rachis. Serotonin stimulation of the enzyme activity was also variable. An eightfold increase was observed in autozooid tissues, a six- to sevenfold increase in the peduncle and about a 10-fold increase in rachidial membrane preparations. Dopamine and serotonin stimulation of adenylate cyclase activity were additive with the isoproterenol effect in all three parts of the colony.

Octopamine had no significant effect on adenylate cyclase activity and was not observed to have any inhibitory effect on isoproterenol-induced stimulation of the

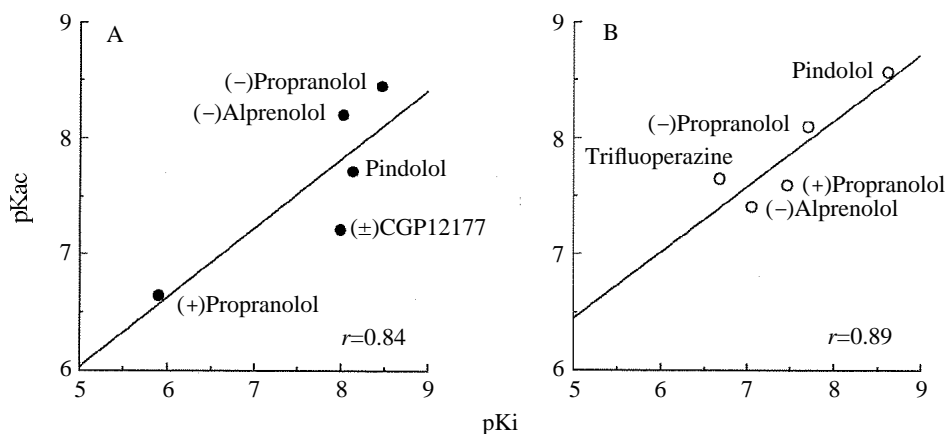

Fig. 6. Correlation between the potency values of different antagonists tested on adenylate cyclase activity (pKac) and on  $\beta$ -adrenergic binding sites (pKi) in autozooid (A) and peduncle (B) tissues. pKac values are those listed in Table 3. pKi values are the inverse logarithm of affinity values of the corresponding blockers reported in Awad and Ancil (1993).

enzyme. The native neuropeptide Antho-RFamide induced a 1.5-fold increase in adenylate cyclase activity in autozooid and peduncle tissues, but failed to cause any such response in the rachis. Antho-RFamide stimulation was not additive with the isoproterenol effect in autozooid and peduncle tissues and had no significant effect on isoproterenol stimulation of adenylate cyclase in the rachis.

### Discussion

The presence of  $\beta$ -like adrenoceptors associated with neuroeffector activities in the tissues of *R. koellikeri* has been demonstrated previously (Awad and Anctil, 1993). In this study we report the positive coupling of these receptors with adenylate cyclase, apparently *via* a Gs protein.

Adenylate cyclase activity in the sea pansy is stimulated by both fluoride ions and the non-hydrolysable analogues of GTP, GTP $\gamma$ S and Gpp(NH)p, whereas the GDP analogue GDP $\beta$ s inhibits the enzyme activity slightly. This suggests that the adenylate cyclase system in *R. koellikeri* is activated by GTP *via* a G protein. Adenylate cyclase systems sensitive to guanine nucleotides and fluoride ions have been reported in other invertebrate species, such as flatworms (Ferreti *et al.* 1989; Ribeiro and Webb, 1987; McNall and Mansour, 1985), annelids (Robertson and Osborne, 1979), molluscs (Drummond *et al.* 1985; Weiss and Drummond, 1985) and insects (Morton, 1984; Uzzan and Dudai, 1982; Harmar and Horn, 1977).

The stimulatory effect of cholera toxin on adenylate cyclase activity might be an indication of the involvement of a stimulatory (Gs) protein in the activation of the enzyme. Cholera toxin produced by the bacterium *Vibrio cholerae* is reported to act on adenylate cyclase systems in nearly all types of eukaryotic cells (Gill, 1977), including yeast (Nakafuku *et al.* 1987) and slime molds (Johnson *et al.* 1989). The presence of a Gs protein in the abdominal ganglion of *Aplysia californica*, where ADP-ribosylation of a G protein was observed, was proposed by Schwartz *et al.* (1983). It was also postulated to be present in the protozoan *Tetrahymena*, where cholera toxin stimulated phagocytosis (De Jesus and Renaud, 1989). The bacterial toxin is known to activate adenylate cyclase by catalysing the transfer of the ADP-ribose moiety of NAD<sup>+</sup> to the  $\alpha$ -subunit of Gs proteins. The ADP-ribosylation of Gs $\alpha$  markedly inhibits the GTPase activity and hence prolongs the lifetime of the Gs $\alpha$ -GTP complex, which in turn stimulates adenylate cyclase (Stadel, 1991). Since the site of ADP-ribosylation is an arginine residue in the middle of the  $\alpha$ -subunit (Kaziro *et al.* 1992), the activation of adenylate cyclase by cholera toxin in *R. koellikeri* suggests a structural homology between the Gs protein transduction system of this coelenterate and that of mammals.

Our results indicate that the diterpene forskolin, which is known to act directly on adenylate cyclase (Seamon *et al.* 1981), at 100  $\mu\text{mol l}^{-1}$ , had no effect on basal or isoproterenol-induced stimulation of the enzyme. Forskolin-insensitive adenylate cyclase systems have been reported in several invertebrates, including flatworms (Ferreti *et al.* 1989), molluscs (Weiss and Drummond, 1985) and insects (Gole *et al.* 1986). The lack of a forskolin effect on the adenylate cyclase system in *R. koellikeri* might be due to a

difference in pharmacological selectivity between the adenylyl cyclase enzyme of this early metazoan and that of higher vertebrates.

In this study, the responsiveness of adenylyl cyclase to various  $\beta$ -adrenergic agonists suggests coupling of the  $\beta$ -adrenoceptors previously reported in the sea pansy (Awad and Anctil, 1993) with this enzyme. In autozooid tissues, the stimulation of adenylyl cyclase activity by isoproterenol and epinephrine, but not norepinephrine, reflects a coupling with the  $\beta_2$ -like adrenoceptor in *R. koellikeri*. The agonist action of the  $\beta_1$ -selective blocker atenolol is not surprising since it was found to act on the  $\beta_2$ -like adrenoceptor and to induce luminescence in this species (Awad and Anctil, 1993). The pharmacological specificity of  $\beta$ -adrenergic agonists on adenylyl cyclase activation is identical to that of the  $\beta_1$ -like adrenoceptor reported to be present in peduncle and rachidial tissues of the sea pansy. The dependency of isoproterenol-induced and atenolol-induced stimulation of adenylyl cyclase activity on guanine nucleotides suggests that the coupling of the  $\beta$ -like adrenoceptors in *R. koellikeri* with this enzyme is *via* a G protein. In addition, the effect of the phosphodiesterase inhibitor theophylline on the isoproterenol-induced increase in cyclic AMP production might indicate the presence of a native phosphodiesterase in the assay medium that is sensitive to that methylxanthine.

Although a substantial amount of work has been done on the effect of serotonin, dopamine and octopamine on adenylyl cyclase systems in invertebrate tissues, few studies have been carried out on the stimulation of this enzyme activity by adrenergic agents. To our knowledge, this study represents the first evidence of the presence of a catecholamine-sensitive adenylyl cyclase system in Cnidaria. One of the very few examples of the effect of adrenergic agents on adenylyl cyclase systems in invertebrates comes from the study of Biondi *et al.* (1982), who demonstrated a slight increase in cyclic AMP production caused by norepinephrine in muscle tissues of the leech *Hirudo medicinalis*. Propranolol-sensitive  $\beta$ -adrenergic binding sites involved in the stimulation of phagocytosis were reported in the unicellular eukaryote *Paramecium aurelia* (Wyroba, 1989), but their possible coupling with adenylyl cyclase was not investigated.

In order to correlate previous radioligand binding studies (Awad and Anctil, 1993) with functional responses, the effects of several  $\beta$ -antagonists were tested for their potency as inhibitors of isoproterenol-induced stimulation of adenylyl cyclase activity in tissues of the sea pansy. Our studies had previously associated different pharmacological profiles of  $\beta$ -adrenergic antagonists with  $\beta$ -like adrenergic binding sites in autozooid and peduncle tissues (Awad and Anctil, 1993). The effect of these blockers (reported here) on catecholamine-sensitive adenylyl cyclase in *R. koellikeri* confirms the presence of two different  $\beta$ -like adrenoceptors in the colony. From a comparison of the  $K_D$  values of the various blockers tested on adenylyl cyclase activity *versus*  $\beta$ -adrenergic binding sites (Fig. 6), it can be concluded from the significant correlation that the  $\beta_1$ -like adrenoceptor present in peduncle and rachidial tissues and the  $\beta_2$ -like adrenoceptor present in polyp tissues are both directly coupled to an adenylyl cyclase system.

The partial inhibition of isoproterenol-induced stimulation of adenylyl cyclase activity by trifluoperazine or ( $\pm$ )CGP12177, and the complete blockage of this stimulatory effect when both antagonists are present in the assay medium, suggests the presence of both site<sub>1</sub>

( $\beta_2$ -like) and site<sub>2</sub> ( $\beta_1$ -like) in the rachis. Their dual presence in this tissue was previously proposed by Awad and Anctil (1993). This is further demonstrated by the differential effect of atenolol on adenylate cyclase activity, the antagonistic effect of ( $\pm$ )CGP12177, but not trifluoperazine, on atenolol-stimulated enzyme activity and the non-additive effect of isoproterenol and atenolol on adenylate cyclase activity in rachidial tissues.

Although Venturini *et al.* (1984) failed to detect any change in adenylate cyclase activity of the cnidarian *Chlorohydra viridissima* following exposure to serotonin and dopamine, adenylate cyclase activity in the anthozoan *R. koellikeri* is greatly stimulated by these biogenic amines. The additive effects of dopamine and serotonin to the isoproterenol-induced stimulation of the enzyme activity suggest that these amines act *via* receptors other than  $\beta$ -adrenergic receptors in the tissues of the sea pansy, possibly through dopaminergic and serotonergic receptors. The presence of serotonin and dopamine has been reported in *R. koellikeri* (Umbriaco *et al.* 1990; De Waele *et al.* 1987). In addition, a cyclic-AMP-mediated serotonergic mechanism involved in the modulation of rhythmic contractions and peristalsis in the sea pansy has been described by Anctil (1989). Stimulation of adenylate cyclase by dopamine and serotonin has been reported in several invertebrate species, including insects (Lafon-Cazal and Bockaert, 1984; Uzzan and Dudai, 1982; Kilpatrick *et al.* 1980; Bodnaryk, 1979), molluscs (Drummond *et al.* 1980, 1985), annelids (Robertson and Osborne, 1979) and flatworms (McNall and Mansour, 1985; Biondi *et al.* 1982).

Although octopamine receptors and their coupling to adenylate cyclase are quite ubiquitous in arthropods, octopamine had no apparent effect on the cnidarian adenylate cyclase system. Octopamine has not been detected by HPLC-ED in *R. koellikeri* (Pani and Anctil, 1993). The small or ineffective stimulation of adenylate cyclase activity by the native neuropeptide Antho-RFamide might suggest that its action on rhythmic contractions in *R. koellikeri* (Anctil and Grimmelikhuijzen, 1989) is not likely to be associated with cyclic AMP.

This paper presents the first biochemical and pharmacological characterization of an adenylate cyclase system coupled to  $\beta$ -adrenoceptors in a coelenterate. Along with the data presented previously on  $\beta$ -adrenergic binding, this study suggests that the basic elements of the receptor-dependent G protein signal transduction systems described in mammals are also present in early metazoans. It implies that  $\beta$ -adrenergically mediated transduction mechanisms originated early in invertebrate evolution and have been conserved in higher animals.

This work was funded by the Natural Sciences and Engineering Research Council of Canada (Grant no A6447 to M.A.). Other support was provided by a fellowship to E.W.A. from the Faculté des Etudes Supérieures and Centre de Recherche en Sciences Neurologiques, Université de Montréal.

### References

- ANCTIL, M. (1989). Modulation of a rhythmic activity by serotonin via cyclic AMP in the coelenterate *Renilla koellikeri*. *J.comp. Physiol.* **159B**, 491–500.
- ANCTIL, M., BOULAY, D. AND LARIVIERE, L. (1982). Monoaminergic mechanisms associated with

- control of luminescence and contractile activities in the coelenterate, *Renilla koellikeri*. *J. exp. Zool.* **223**, 11–24.
- ANCTIL, M., GERMAIN, G. AND LARIVIERE, L. (1984). Catecholamines in the coelenterate *Renilla koellikeri*. Uptake and radioautographic localization. *Cell Tissue Res.* **238**, 69–80.
- ANCTIL, M. AND GRIMMELIKHUIJZEN, C. J. P. (1989). Excitatory action of the native neuropeptide antho-RFamide on muscles in the pennatulid *Renilla koellikeri*. *Gen. Pharmac.* **20**, 381–384.
- ANDERSON, P. A. V. AND CASE, J. F. (1975). Electrical activity associated with luminescence and other colonial behavior in the pennatulid *Renilla koellikeri*. *Biol. Bull. mar. biol. Lab., Woods Hole* **149**, 80–95.
- ANDERSON, P. A. V. AND SCHWAB, W. E. (1982). Recent advances and model systems in coelenterate neurobiology. *Prog. Neurobiol.* **19**, 213–236.
- ANDERSON, P. A. V. AND SPENCER, A. N. (1989). The importance of cnidarian synapses for neurobiology. *J. Neurobiol.* **20**, 435–457.
- AWAD, E. W. AND ANCTIL, M. (1993). Identification of  $\beta$ -like adrenoceptors associated with bioluminescence in the sea pansy *Renilla koellikeri*. *J. exp. Biol.* **177**, 181–200.
- BIONDI, C., BELARDETTI, F., BRUNELLI, M. AND TREVISANI, A. (1982). Modulation of cyclic AMP levels by neurotransmitters in excitable tissues of the leech *Hirudo medicinalis*. *Comp. Biochem. Physiol.* **72C**, 33–37.
- BODNARYK, R. P. (1979). Identification of specific dopamine- and octopamine-sensitive adenylate cyclases in the brain of *Mamestra configurata* Wlk. *Insect Biochem.* **9**, 155–162.
- BRADFORD, M. M. (1976). A rapid and sensitive method for the quantification of microgram quantities of protein–dye binding. *Analyt. Biochem.* **72**, 248–254.
- DE JESUS, S. AND RENAUD, F. L. (1989). Phagocytosis in *Tetrahymena thermophila*: naloxone-reversible inhibition by opiates. *Comp. Biochem. Physiol.* **92C**, 139–142.
- DE WAELE, J.-P., ANCTIL, M. AND CARLBERG, M. (1987). Biogenic catecholamines in the cnidarian *Renilla koellikeri*: radioenzymatic and chromatographic detection. *Can. J. Zool.* **65**, 2458–2465.
- DRUMMOND, A. H., BUCER, F. AND LEVITAN, I. B. (1980). Distribution of serotonin and dopamine receptors in *Aplysia* tissues: analysis by [<sup>3</sup>H]LSD-binding and adenylate cyclase stimulation. *Brain Res.* **184**, 163–177.
- DRUMMOND, G. I., WERNHAM, S. AND LUKOWIAK, K. (1985). Stimulation of adenylate cyclase in the heart of *Aplysia californica* by biogenic amines. *Comp. Biochem. Physiol.* **80C**, 129–133.
- FERRETI, M. E., PORTOLAN, A., PARESCI, M. C., CAMPI, A. L. AND BIONDI, C. (1989). Some properties of adenylate cyclase in the segmental ganglia of the leech *Hirudo medicinalis*. *Comp. Biochem. Physiol.* **94C**, 635–640.
- GILL, D. M. (1977). The mechanism of action of cholera toxin. *Adv. cyclic Nucleotide Res.* **8**, 85–118.
- GOLE, J. W. D., ORR, G. L. AND DOWNER, R. G. H. (1986). Forskolin-insensitive adenylate cyclase in cultured cells of *Choristoneura fumiferana* (Insecta). *Biochem. biophys. Res. Commun.* **145**, 1192–1197.
- HARMAR, A. J. AND HORN, A. S. (1977). Octopamine-sensitive adenylate cyclase in cockroach brain: effects of agonists, antagonists and guanylyl nucleotides. *Molec. Pharmac.* **13**, 512–520.
- JOHNSON, R. L., GUNDERSEN, R., LILLY, P., PITT, G. S., PUPILLO, M., SUN, T. J., VAUGAN, R. A. AND DEVREOTES, P. N. (1989). G-protein-linked signal transduction systems control development in *Dyctiostelium*. *Development* **1989 Supplement**, 75–80.
- KAZIRO, Y., ITOH, H., KOZASA, T., NAKAFUKU, M. AND SATOH, T. (1992). Structure and function of signal-transducing GTP-binding proteins. *A. Rev. Biochem.* **60**, 349–400.
- KILPATRICK, A. T., VAUGHAN, P. F. T. AND DONNELAN, T. (1980). Monoamine sensitive adenylate cyclase in *Schistocerca gregaria* nervous tissue. In *Insect Neurobiology and Pesticide Action*. pp. 341–345. London: Proceedings of the Society of the Chemical Industry.
- LAFON-CAZAL, M. AND BOCKAERT, J. (1984). Pharmacological characterization of dopamine-sensitive adenylate cyclase in the salivary glands of *Locusta migratoria*. *Insect Biochem.* **14**, 541–546.
- MCNALL, S. J. AND MANSOUR, T. E. (1985). Forskolin activation of serotonin-stimulated adenylate cyclase in the liver fluke *Fasciola hepatica*. *Biochem. Pharmac.* **34**, 1683–1688.
- MORIN, J. G. (1974). Coelenterate bioluminescence. In *Coelenterate Biology. Review and New Perspectives* (ed. L. Muscatine and H. M. Leuhoff), pp. 397–438. New York: Academic Press.
- MORTON, D. B. (1984). Pharmacology of the octopamine-stimulated adenylate cyclase of the locust and tick CNS. *Comp. Biochem Physiol.* **78C**, 153–158.
- NAKAFUKU, M., ITOH, H., NAKAMURA, S. AND KAZIRO, Y. (1987). Occurrence in *Saccaromyces*

- cerevisiae* of a gene homologous to the cDNA coding for the subunit of mammalian G proteins. *Proc. natn. Acad. Sci. U.S.A.* **84**, 2140–2144.
- PANI, A. K. AND ANCTIL, M. (1993). Quantitative survey of biogenic monoamines, their precursors and metabolites in the coelenterate *Renilla koellikeri*. *Biogenic Amines* (in press).
- RIBEIRO, P. AND WEBB, R. A. (1987). Characterization of a serotonin transporter and an adenylate cyclase-linked serotonin receptor in the cestode *Hymenolepis diminuta*. *Life Sci.* **40**, 755–768.
- ROBERTSON, H. A. AND OSBORNE, N. N. (1979). Putative neurotransmitters in the annelid central nervous system: presence of 5-hydroxytryptamine and octopamine-stimulated adenylate cyclases. *Comp. Biochem. Physiol.* **64C**, 7–14.
- SALOMON, Y. (1979). Adenylate cyclase assay. *Adv. cyclic Nucleotide Res.* **10**, 35–55.
- SCHWARTZ, J. H., BERNIER, L., CASTELLUCCI, V. F., PALAZZOLO, M., SAITOH, P., STAPLETON, A. AND KANDEL, E. R. (1983). What molecular steps determine the time course of the memory for short-term sensitization in *Aplysia*? *Cold Spring Harbor Symp. quant. Biol.* **48**, 811–819.
- SEAMON, K. B., PADGETT, W. AND DALY, J. W. (1981). Forskolin: unique diterpene activator of adenylate cyclase in membranes and in intact cells. *Proc. natn. Acad. Sci. U.S.A.* **78**, 3363–3367.
- STADEL, J. M. (1991).  $\beta$ -Adrenoceptor signal transduction. *Prog. basic clin. Pharmac.* **7**, 67–104.
- UMBRIACO, D., ANCTIL, M. AND DESCARRIES, L. (1990). Serotonin-immunoreactive neurons in the cnidarian *Renilla koellikeri*. *J. comp. Neurol.* **291**, 167–178.
- UZZAN, A. AND DUDAI, Y. (1982). Aminergic receptors in *Drosophila melanogaster*: responsiveness of adenylate cyclase to putative neurotransmitters. *J. Neurochem.* **38**, 1542–1550.
- VENTURINI, G., SILEI, O., PALLADINI, G., CAROLEI, A. AND MARGOTTA, V. (1984). Aminergic neurotransmitters and adenylate cyclase in *Hydra*. *Comp. Biochem. Physiol.* **78C**, 345–348.
- WEISS, S. AND DRUMMOND, G. I. (1985). Biochemical properties of adenylate cyclase in the gill of *Aplysia californica*. *Comp. Biochem. Physiol.* **80B**, 251–255.
- WYROBA, E. (1989). Beta-adrenergic stimulation of phagocytosis in the unicellular eukaryote *Paramecium aurelia*. *Cell Biol. Int. Rep.* **13**, 667–678.
